# Supplementary material for: Improving Medication Adherence With Telemedicine for Adults With Severe Mental Illness
Source: Atypon-hosted journal article supplement (doi:10.1176/appi.ps.201800286), 2019-01-17
Supplement: appi.ps.201800286.ds001.pdf [file appi.ps.201800286.ds001.pdf]

**Standard operation procedure: Participant is out of reach**

*Date of talk:* If the participant is not reachable at the agreed date....

- ➔ Call **two times** again at the same day
  
- ➔ If the patient is not reached:
  - Try **one week two times** a day to reach the participant
  
  - **Day 2** and **4** after agreed date: send text-message to remind the participant of the call
  
- ➔ If the participant is reached:
  - make up for the talk/interview or find a new date.
  
- ➔ If the participant is not reached for one week contacting is stopped.

### Flow of participants through the trial

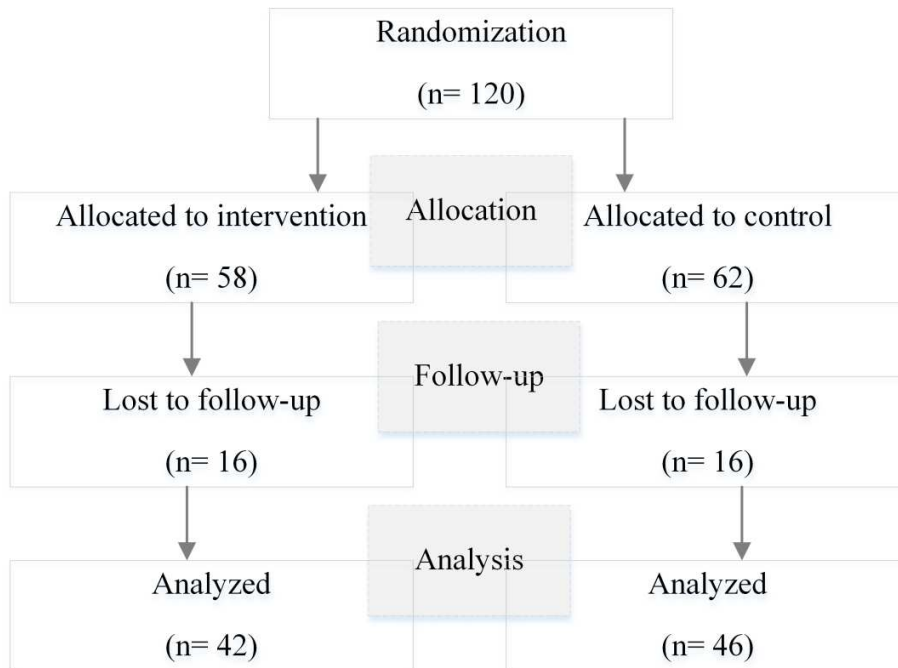

### Baseline characteristics of the study participants

|                                                                      | Total       |      | Intervention group |      | Control group |      | Chi <sup>2</sup> /<br>t | p-value |
|----------------------------------------------------------------------|-------------|------|--------------------|------|---------------|------|-------------------------|---------|
|                                                                      | N           | %    | N                  | %    | N             | %    |                         |         |
| Participants                                                         | 120         |      | 58                 | 48.3 | 62            | 51.7 |                         |         |
| Age at baseline, years (M±SD)                                        | 42.92±12.94 |      | 43.94±13.17        |      | 41.95±12.75   |      | .84                     | .401    |
| Females                                                              | 50          | 41.7 | 27                 | 46.6 | 23            | 37.1 | 1.10                    | .204    |
| <i>Diagnosis</i>                                                     |             |      |                    |      |               |      |                         |         |
| Schizophrenia                                                        | 96          | 80   | 46                 | 79.3 | 45            | 72.6 | 1.18                    | .278    |
| Bipolar disorder                                                     | 24          | 20   | 12                 | 20.7 | 12            | 27.4 | .17                     | .682    |
| <i>Medication</i>                                                    |             |      |                    |      |               |      |                         |         |
| Lithium                                                              | 13          | 10.8 | 5                  | 13.8 | 8             | 12.9 | 1.02                    | .313    |
| Antidepressants                                                      | 53          | 44.2 | 20                 | 34.5 | 33            | 53.2 | 4.27                    | .039    |
| Antiepileptics                                                       | 27          | 22.5 | 18                 | 31.0 | 9             | 14.5 | 4.69                    | .030    |
| Benzodiazepines                                                      | 23          | 19.2 | 11                 | 19.0 | 12            | 19.4 | .01                     | .957    |
| Clozapine                                                            | 17          | 14.2 | 6                  | 10.3 | 11            | 17.7 | 1.34                    | .246    |
| Typical neuroleptics                                                 | 23          | 19.2 | 12                 | 20.7 | 11            | 17.7 | .17                     | .682    |
| Atypical neuroleptics                                                | 97          | 80.8 | 51                 | 87.9 | 46            | 74.2 | .37                     | .056    |
| Sum of medication                                                    | 2.28±1.01   |      | 2.29±.96           |      | 2.11±1.04     |      | .99                     | .326    |
| Medication: adherent (MARS-D)                                        | 53          | 44.2 | 24                 | 41.3 | 29            | 46.8 | .72                     | .396    |
| Social desirability: Exaggeration of positive qualities (PQ+) (M±SD) | 2.68±.846   |      | 2.64±.953          |      | 2.71±.76      |      | -.42                    | .678    |
| Social desirability: minimization of negative qualities (NQ) (M±SD)  | 1.14±.85    |      | 1.19±.86           |      | 2.71±.76      |      | .52                     | .639    |

|                                                                     | <b>Baseline<br/>(4 investigators)</b> |                | <b>6 months follow-up<br/>(4 investigators)</b> |                |
|---------------------------------------------------------------------|---------------------------------------|----------------|-------------------------------------------------|----------------|
|                                                                     | <i>Chi<sup>2</sup>/F</i>              | <i>p-value</i> | <i>Chi<sup>2</sup>/F</i>                        | <i>p-value</i> |
| Medication adherence (MARS-D)<br><i>(adherent vs. non adherent)</i> | 1.34                                  | .721           | .18                                             | .606           |
| Social desirability:<br>Exaggeration of positive qualities (PQ+)    | .64                                   | .589           | .55                                             | .648           |
| Social desirability:<br>minimization of negative qualities (NQ-)    | .66                                   | .579           | 2.04                                            | .116           |

**Interviewer bias**

|                                                                       | <b>Drop-out after 6 months</b> |                |
|-----------------------------------------------------------------------|--------------------------------|----------------|
|                                                                       | <i>Chi<sup>2</sup>/t</i>       | <i>p-value</i> |
| Group                                                                 | .08                            | .777           |
| Age                                                                   | -1.02                          | .308           |
| Sex                                                                   | .21                            | .151           |
| Medication adherence (MARS-D)<br>( <i>adherent vs. non adherent</i> ) | .91                            | .339           |
| Social desirability:<br>Exaggeration of positive qualities (PQ+)      | -1.90                          | .066           |
| Social desirability:<br>minimization of negative qualities (NQ-)      | .14                            | .075           |

**Predictors of drop-out**

**Percentage of (non) adherent patients in the intervention and control group  
at baseline and after six months**

*(IG: intervention group receiving telemedical call and text messages, CG: control group)*

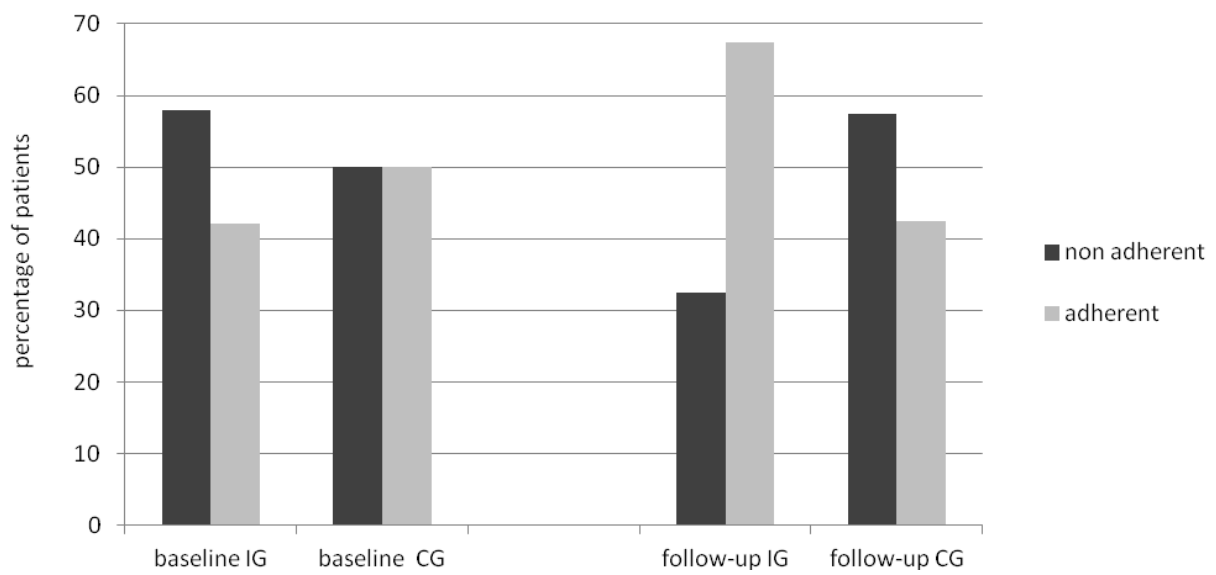

**Results of intention to treat analysis predicting medication adherence after three and six months**

|                                                                  | Follow-up<br>MARS-D (3 months) |             |         | Follow-up<br>MARS-D (6 months) |                  |         |
|------------------------------------------------------------------|--------------------------------|-------------|---------|--------------------------------|------------------|---------|
|                                                                  | OR                             | CI          | p-value | OR                             | CI               | p-value |
| Group<br>(reference: control group)                              | 1.89                           | .74 to 4.85 | .187    | 6.79                           | 1.98 to<br>23.28 | .002    |
| Age                                                              | 1.03                           | .99 to 1.08 | .135    | 1.02                           | .97 to 1.07      | .482    |
| Sex                                                              | .73                            | .27 to 2.00 | .541    | .73                            | .23 to 2.29      | .591    |
| MARS-D Baseline<br>(reference: no adherent)                      | .52                            | .19 to 1.41 | .200    | .34                            | 0.12 to .99      | .049    |
| Social desirability: Exaggeration of<br>positive qualities (PQ+) | 1.15                           | .59 to 2.24 | .690    | 1.64                           | 8.6 to 3.17      | .139    |
| Social desirability: Minimization of<br>negative qualities (NQ)  | .91                            | .45 to 1.87 | .789    | .61                            | .29 to 1.26      | .178    |
| Diagnosis<br>(reference : bipolar disorder)                      | 1.15                           | .64 to 6.08 | .238    | 1.65                           | .29 to 9.24      | .571    |
| Sum of medications                                               | 1.15                           | .01 to 5.43 | .585    | .905                           | .50 to 1.63      | .738    |

**Results of per protocol analysis predicting medication adherence after three and six months**

|                                                               | Follow-up<br>MARS-D 3 Month |             |         | Follow-up<br>MARS-D 6 Month |               |         |
|---------------------------------------------------------------|-----------------------------|-------------|---------|-----------------------------|---------------|---------|
|                                                               | OR                          | CI          | p-value | OR                          | CI            | p-value |
| Group<br>(reference: control group)                           | 1.69                        | .61 to 1.41 | .314    | 5.04                        | 1.54 to 16.53 | .008    |
| Age                                                           | 1.04                        | .99 to 1.09 | .122    | 1.02                        | .97 to 1.07   | .481    |
| Sex                                                           | .73                         | .25 to 2.15 | .899    | .63                         | .19 to 2.07   | .446    |
| MARS-D Baseline<br>(reference: no adherent)                   | .52                         | .19 to 1.41 | .561    | .39                         | .13 to 1.16   | .009    |
| Social desirability: Exaggeration of positive qualities (PQ+) | 1.17                        | .61 to 2.25 | .647    | 1.59                        | .79 to 3.18   | .188    |
| Social desirability: Minimization of negative qualities (NQ)  | .97                         | .49 to 1.87 | .915    | .56                         | .25 to 1.28   | .171    |
| Diagnosis<br>(reference : bipolar disorder)                   | 1.74                        | .55 to 5.43 | .344    | 2.29                        | .29 to 17.53  | .425    |
| Sum of medications                                            | 1.09                        | .64 to 1.85 | .762    | 1.03                        | .56 to 1.91   | .916    |
